# Supplementary material
Source: MDPI journal article supplement (https://www.mdpi.com/2227-7102/13/4/346)
Supplement: s1 [file s1]

Supplementary Table S1: Number and percentage of supervisors involved in UGR in different departments in COMHS and SQUH

| Department                       | Number | Percent among all respondents |
|----------------------------------|--------|-------------------------------|
| Allied Health Sciences           | 1      | 1.1                           |
| Anatomy                          | 4      | 4.6                           |
| Behavioural Medicine             | 4      | 4.6                           |
| Biochemistry                     | 6      | 6.9                           |
| Child Health                     | 4      | 4.6                           |
| Emergency Medicine               | 6      | 6.9                           |
| FAMCO                            | 1      | 1.1                           |
| Genetics                         | 1      | 1.1                           |
| Hematology                       | 4      | 4.6                           |
| Medicine                         | 8      | 9.2                           |
| Microbiology & Immunology        | 7      | 8.0                           |
| Obstetrics & Gynaecology         | 6      | 6.9                           |
| Pathology                        | 3      | 3.4                           |
| Pharmacology & Clinical Pharmacy | 4      | 4.6                           |
| Physiology                       | 3      | 3.4                           |
| Human & Clinical Anatomy         | 2      | 2.3                           |
| Family medicine                  | 1      | 1.1                           |
| BMS                              | 2      | 2.3                           |
| surgery                          | 9      | 10.3                          |
| Total                            | 76     | 87.4                          |
| no replay                        | 11     | 12.6                          |
| Total                            | 87     | 100.0                         |
